# Supplementary material for: Effects of caloric overload before caloric restriction in the murine heart
Source: Aging (Albany NY). 2022 Mar 28;14(6):2695–719. doi: 10.18632/aging.203967 (PMC9004582; doi:10.18632/aging.203967)
Supplement: Supplementary Table 2 [file aging-14-203967-s002.xlsx]

## Sheet: Supplementary Table 2
Supplementary Table 2. High-calorie diet composition.
	%	Energy cal/100 g	Crude Protein	Crude fat	Crude Fibre	Crude Ash	Calcium	Phosphorus	Lysine	Methionione Cystine	Arginine	Histidine	Tryptophan	Phenyl Alanine Tyrosine	Threonine	Leucine	Isoleucine	Valine
Yeast Basis	0.21	250	11.746	4.161	2.109	2.321	0.2943	0.4601	0.5888	0.4154	0.7384	0.2809	0.1362	0.8917	0.454	1.015	0.4403	0.5505
Corn Flour	0.19	360	7.8	3.5	1.6	0.3	0.02	0.27	0.23	0.3	0.37	0.2	0.08	0.69	0.29	0.93	0.24	0.35
Peanut	0.11	574	44.7	7.2	5.9	5.1	0.25	0.53	1.32	0.77	4.6	0.83	0.42	3.12	1.05	2.36	1.18	1.28
Yolk Powder	0.29	644	28	60	0.05		0.3	0.21
Lard Oil	0.2	897	98			0.5
	100	550.2	36.5857	19.7308	1.41039	1.20541	0.180103	0.267121	0.312548	0.228934	0.731364	0.188289	0.090002	0.661557	0.26594	0.64945	0.267863	0.322905
